# Supplementary material for: Reversible CO2storage and efficient separation using Ca decorated porphyrin-like porous C24N24fullerene: a DFT study
Source: Royal Society of Chemistry journal article supplement (doi:10.1039/d1ra05888f), 2021-01-01

## “Supplementary Materials”

### Reversible CO<sub>2</sub> storage and efficient separation using Ca decorated porphyrin-like porous C<sub>24</sub>N<sub>24</sub> fullerene: A DFT study

Mehdi D. Esrafil<sup>i</sup> \*<sup>a</sup> and Sharieh Hosseini<sup>b</sup>

<sup>a</sup> Department of Chemistry, Faculty of Basic Sciences, University of Maragheh, P.O. Box 55136-553, Maragheh, Iran

<sup>b</sup> Department of Chemistry, Faculty of Pharmaceutical Chemistry, Tehran Medical Sciences, Islamic Azad University, Tehran, Iran

**Phone:** (+98) 4212237955. **Fax:** (+98) 4212276060. **P.O. Box:** 5513864596. **E-mail:** [esrafil<sup>i</sup>@maragheh.ac.ir](mailto:esrafil<sup>i</sup>@maragheh.ac.ir)

\* Corresponding author. **E-mail:** [esrafil<sup>i</sup>@maragheh.ac.ir](mailto:esrafil<sup>i</sup>@maragheh.ac.ir) (M. D. Esrafil<sup>i</sup>).

**Figure S1.** (a) The geometries of  $\text{Ca}_6\text{C}_{24}\text{N}_{24}$  after the MD simulations (2000 fs, at 600 K) and (b) the variation of potential energy of this system with the time

(a)

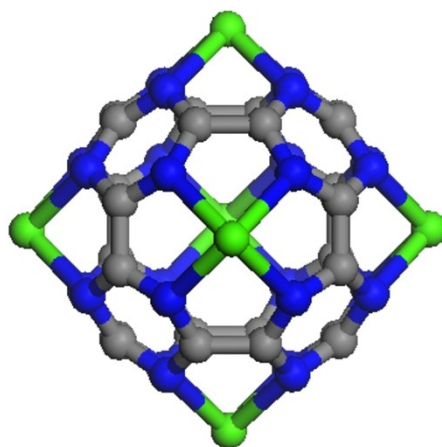

(b)

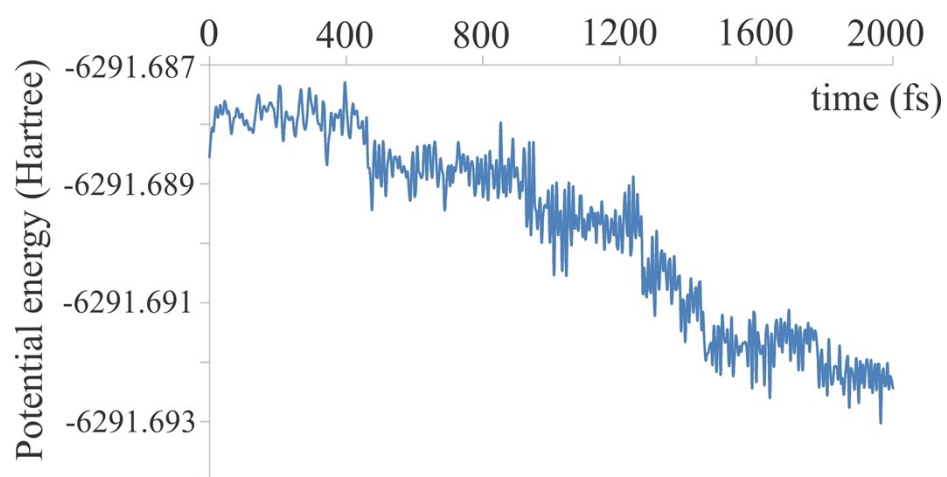

**Figure S2.** Molecular graphs of CO<sub>2</sub> adsorbed structures on CaC<sub>24</sub>N<sub>24</sub>: (a) 1CO<sub>2</sub>@CaC<sub>24</sub>N<sub>24</sub>, (b) 2CO<sub>2</sub>@CaC<sub>24</sub>N<sub>24</sub>, (c) 3CO<sub>2</sub>@CaC<sub>24</sub>N<sub>24</sub>, (d) 4CO<sub>2</sub>@CaC<sub>24</sub>N<sub>24</sub>, (e) 5CO<sub>2</sub>@CaC<sub>24</sub>N<sub>24</sub> and (f) 24CO<sub>2</sub>@CaC<sub>24</sub>N<sub>24</sub>. The small red circles indicate the BCPs.

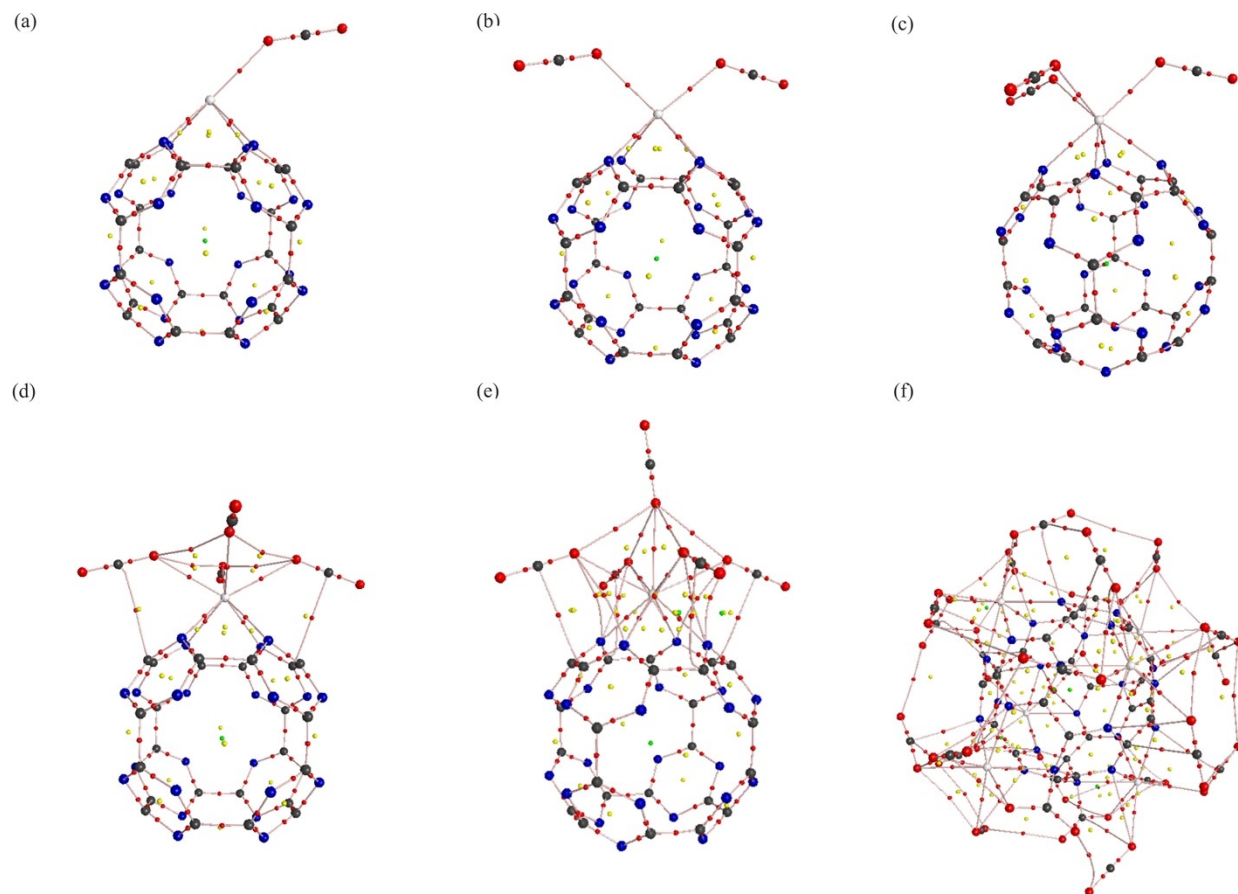

Supplement: d1ra05888f1.pdf [file d1ra05888f1.pdf]
